# Supplementary material for: Covalent bonding of bridged pyridinium aldehyde derivatives with guanine N7 is controlled by CpG site conformation†
Source: Royal Society of Chemistry journal article supplement (doi:10.1039/b104022g), 2001-01-01
Supplement: b104022g.doc [file b104022g.doc]

# Supplementary data

**Figure S1** Binding of the CG, meCG and CRE with BPA. 18% polyacrylamide gel; TBE running buffer. 4 nmoles of oligomer; [BPA]/[oligomer]= 4; lanes 1-3: (without BPA) CG, meCG, CRE; lanes 4-6: (with BPA) incubation time ti at 38 °C ti=0; lanes 7-9: (with BPA) ti=1 h; lanes 10-12: (with BPA) ti=2 h; lanes 13-15: (with BPA) ti=4 h; lanes 16-18: (with BPA) ti=8 h.

##
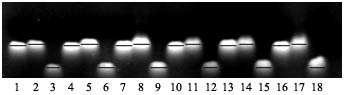


**Figure S2** 500 MHz 2D NOESY of BPAC8/meCG mixture (4/1) after heating (38 °C for 5 hours), in H2O/D2O (90/10) at 280 K.

NHbC6a

H2A5

H2A5a

NHbC6

IG7

IG7a

IT8a

IT8

NHG7

hemi-aminal

CH3C6a

CH3C6

IG7

IG7a

IT8a

IT8

* In water, the aldehydic function of BPA is present as a hydrated form (major form). The corresponding proton resonates at  6.6 ppm while the proton of the aldehydic form is at 10.2 ppm. This correlation shows an exchange between these two forms.
